# Supplementary material
Source: PubMed Central journal article supplement (PMC5679747)
Supplement: NIHMS906044-supplement-8.pdf [file NIHMS906044-supplement-8.pdf]

| Genes    | BAT1   | BAT2   | BAT3   | BAT mean | iWAT<br>1 | iWAT2 | iWAT<br>3 | iWAT<br>mean |
|----------|--------|--------|--------|----------|-----------|-------|-----------|--------------|
| Kcnk3    | 112.71 | 123.58 | 106.05 | 114.11   | 8.99      | 6.22  | 5.32      | 6.84         |
| Kcns3    | 3.12   | 2.17   | 2.21   | 2.50     | 2.41      | 0.69  | 0.82      | 1.31         |
| Kcnn1    | 2.41   | 2.39   | 2.15   | 2.32     | 0.33      | 0.16  | 0.28      | 0.26         |
| Kcnb1    | 2.09   | 0.85   | 1.62   | 1.52     | 0.52      | 0.74  | 0.10      | 0.45         |
| Kcnj11   | 1.28   | 1.41   | 0.88   | 1.19     | 0.00      | 0.00  | 0.25      | 0.08         |
| Kcnk4    | 1.32   | 0.82   | 0.76   | 0.97     | 0.51      | 0.10  | 0.14      | 0.25         |
| Kcnab3   | 1.24   | 0.93   | 0.73   | 0.97     | 0.52      | 0.32  | 0.00      | 0.28         |
| Kcnk2    | 0.55   | 1.10   | 0.59   | 0.74     | 4.03      | 6.77  | 3.31      | 4.71         |
| Kcnk12   | 0.75   | 0.54   | 0.26   | 0.52     | 1.17      | 4.01  | 2.41      | 2.53         |
| Kcnrg    | 0.13   | 0.75   | 0.62   | 0.50     | 1.77      | 6.90  | 4.72      | 4.46         |
| Kcnn4    | 0.59   | 0.19   | 0.41   | 0.40     | 2.98      | 1.41  | 1.86      | 2.08         |
| Kcnc4    | 0.63   | 0.14   | 0.19   | 0.32     | 0.50      | 1.77  | 0.65      | 0.98         |
| Kcnh2    | 0.21   | 0.27   | 0.34   | 0.27     | 0.93      | 0.00  | 0.00      | 0.31         |
| Kcnj8    | 0.32   | 0.15   | 0.28   | 0.25     | 0.69      | 1.30  | 1.22      | 1.07         |
| Kcng2    | 0.13   | 0.37   | 0.17   | 0.22     | 0.46      | 0.66  | 0.82      | 0.65         |
| Kcnk1    | 0.50   | 0.03   | 0.14   | 0.22     | 0.45      | 0.19  | 0.00      | 0.21         |
| Kcnc3    | 0.29   | 0.09   | 0.25   | 0.21     | 0.00      | 0.00  | 0.00      | 0.00         |
| Kcnd2    | 0.24   | 0.11   | 0.26   | 0.21     | 2.12      | 1.85  | 2.21      | 2.06         |
| Kcnj3    | 0.25   | 0.21   | 0.14   | 0.20     | 1.75      | 0.87  | 0.65      | 1.09         |
| Kcna7    | 0.15   | 0.18   | 0.20   | 0.18     | 0.30      | 0.38  | 0.78      | 0.49         |
| Kcnip4   | 0.29   | 0.12   | 0.00   | 0.14     | 0.00      | 0.00  | 0.00      | 0.00         |
| Kcnq1ot1 | 0.18   | 0.06   | 0.10   | 0.12     | 0.11      | 0.08  | 0.20      | 0.13         |
| Kcnab2   | 0.10   | 0.16   | 0.05   | 0.10     | 0.00      | 0.00  | 0.00      | 0.00         |
| Kcnj14   | 0.19   | 0.06   | 0.00   | 0.08     | 1.32      | 0.00  | 0.00      | 0.44         |
| Kcng4    | 0.02   | 0.00   | 0.21   | 0.08     | 0.08      | 0.50  | 0.00      | 0.19         |
| Kcnab1   | 0.07   | 0.07   | 0.08   | 0.07     | 0.00      | 0.15  | 0.00      | 0.05         |
| Kcng3    | 0.09   | 0.02   | 0.11   | 0.07     | 0.00      | 3.44  | 2.53      | 1.99         |
| Kcng1    | 0.04   | 0.07   | 0.10   | 0.07     | 0.52      | 0.28  | 0.00      | 0.27         |
| Kcnk6    | 0.08   | 0.06   | 0.06   | 0.07     | 0.56      | 0.52  | 1.53      | 0.87         |
| Kcnip3   | 0.11   | 0.00   | 0.09   | 0.07     | 0.19      | 0.00  | 0.19      | 0.13         |
| Kcne1l   | 0.00   | 0.00   | 0.17   | 0.06     | 0.39      | 0.73  | 0.14      | 0.42         |
| Kcnma1   | 0.08   | 0.02   | 0.06   | 0.05     | 0.06      | 0.23  | 0.52      | 0.27         |
| Kcnk18   | 0.16   | 0.00   | 0.00   | 0.05     | 0.40      | 0.13  | 0.60      | 0.38         |
| Kcna2    | 0.05   | 0.03   | 0.08   | 0.05     | 0.00      | 0.00  | 0.00      | 0.00         |
| Kcnk5    | 0.03   | 0.01   | 0.11   | 0.05     | 0.13      | 0.27  | 0.21      | 0.20         |
| Kcnd1    | 0.00   | 0.06   | 0.08   | 0.05     | 0.00      | 0.51  | 0.00      | 0.17         |



|        |      |      |      |      |      |      |      |      |      |
|--------|------|------|------|------|------|------|------|------|------|
| Kcna4  | 0.00 | 0.00 | 0.00 | 0.00 | 0.00 | 0.00 | 0.00 | 0.00 | 0.00 |
| Kcnb2  | 0.00 | 0.00 | 0.00 | 0.00 | 0.08 | 0.00 | 0.00 | 0.00 | 0.00 |
| Kcne1  | 0.00 | 0.00 | 0.00 | 0.00 | 0.00 | 0.10 | 0.00 | 0.00 | 0.00 |
| Kcne2  | 0.00 | 0.00 | 0.00 | 0.00 | 0.00 | 0.00 | 0.00 | 0.00 | 0.00 |
| Kcnh5  | 0.00 | 0.00 | 0.00 | 0.00 | 0.00 | 0.23 | 0.00 | 0.00 | 0.00 |
| Kcnip2 | 0.00 | 0.00 | 0.00 | 0.00 | 0.00 | 0.00 | 0.00 | 0.00 | 0.00 |
| Kcnj1  | 0.00 | 0.00 | 0.00 | 0.00 | 0.00 | 0.00 | 0.00 | 0.00 | 0.00 |
| Kcnj13 | 0.00 | 0.00 | 0.00 | 0.00 | 0.08 | 0.12 | 0.00 | 0.00 | 0.00 |
| Kcnj5  | 0.00 | 0.00 | 0.00 | 0.00 | 0.00 | 0.00 | 0.00 | 0.00 | 0.00 |
| Kcnj6  | 0.00 | 0.00 | 0.00 | 0.00 | 0.00 | 0.00 | 0.00 | 0.00 | 0.00 |
| Kcnk10 | 0.00 | 0.00 | 0.00 | 0.00 | 0.25 | 0.00 | 0.00 | 0.00 | 0.00 |
| Kcnk15 | 0.00 | 0.00 | 0.00 | 0.00 | 0.08 | 0.00 | 0.00 | 0.00 | 0.00 |
| Kcnk16 | 0.00 | 0.00 | 0.00 | 0.00 | 0.00 | 0.11 | 0.00 | 0.00 | 0.00 |
| Kcnk7  | 0.00 | 0.00 | 0.00 | 0.00 | 0.00 | 0.50 | 0.00 | 0.00 | 0.00 |
| Kcnk9  | 0.00 | 0.00 | 0.00 | 0.00 | 0.00 | 0.00 | 0.00 | 0.00 | 0.00 |
| Kcnmb1 | 0.00 | 0.00 | 0.00 | 0.00 | 0.00 | 0.00 | 0.00 | 0.00 | 0.00 |
| Kcnmb2 | 0.00 | 0.00 | 0.00 | 0.00 | 0.00 | 0.00 | 0.00 | 0.00 | 0.00 |
| Kcnmb3 | 0.00 | 0.00 | 0.00 | 0.00 | 0.00 | 0.00 | 0.00 | 0.00 | 0.00 |
| Kcnq3  | 0.00 | 0.00 | 0.00 | 0.00 | 0.00 | 0.00 | 0.00 | 0.00 | 0.00 |
| Kcns1  | 0.00 | 0.00 | 0.00 | 0.00 | 0.00 | 0.06 | 0.00 | 0.00 | 0.00 |

**Table S1. Expression Levels of Potassium Channels in Brown Adipocytes  
Represented in FPKM Values by Adiponectin-TRAP. Related to Figure 1.**

| Gene   | Forward Primer             | Reverse Primer             |
|--------|----------------------------|----------------------------|
| aP2    | ACACCGAGATTTCTTCAAAGT      | CCATCTAGGGTTATGATGCTCTTCA  |
| AdipQ  | GCACTGGCAAGTTCTACTGCAA     | GTAGGTGAAGAGAACGGCCTTGT    |
| Pparg2 | GTGCCAGTTTCGATCCGTAGA      | GGCCAGCATCGTGTAGATGA       |
| Ucp1   | CTTTGCCTCACTCAGGATTGG      | ACTGCCACACCTCCAGTCATT      |
| Dio2   | CAGTGTGGTGCACGTCTCCAATC    | TGAACCAAAGTTGACCACCAG      |
| Cpt1b  | TCCTGCCAATGGACGTTTCG       | GTCCCACTGGTTCAGTTGGT       |
| Elvol3 | TCCGCGTTTCTCATGTAGGTCT     | GGACCTGATGCAACCCTATGA      |
| Cox7a1 | CAGCGTCATGGTCAGTCTGT       | AGAAAACCGTGTGGCAGAGA       |
| Cox8b  | TGTGGGGATCTCAGCCATAGT      | AGTGGGCTAAGACCCATCCTG      |
| Acs1   | TGGGGTGGAAATCATCAGCC       | TGGGGTGGAAATCATCAGCC       |
| Prdm16 | CAGCACGGTGAAGCCATTC        | GCGTGCATCCGCTTGTG          |
| Kcnk3  | ACGGAGGCAAGGTGTTCTG        | ACGACACGAAACCGATGAGC       |
| Pgc1a  | TGATGTGAATGACTTGGATACAGACA | GCTCATTGTTGTAAGTGGTGGATATG |
| Adrb1  | CTCATCGTGGTGGGTAACGTG      | ACACACAGCACATCTACCGAA      |
| Adrb2  | GGGAACGACAGCGACTTCTT       | GCCAGGACGATAACCGACAT       |
| Adrb3  | AGAAACGGCTCTCTGGCTTTG      | TGGTTATGGTCTGTAGTCTCGG     |
| Tbp    | CCCCTTGTACCCTTCACCAAT      | GAAGCTGCGGTACAATTCCAG      |

**Table S2. qPCR Primers Used in the Study. Related to STAR Methods section.**
