# Supplementary material
Source: PubMed Central journal article supplement (PMC5679747)

A

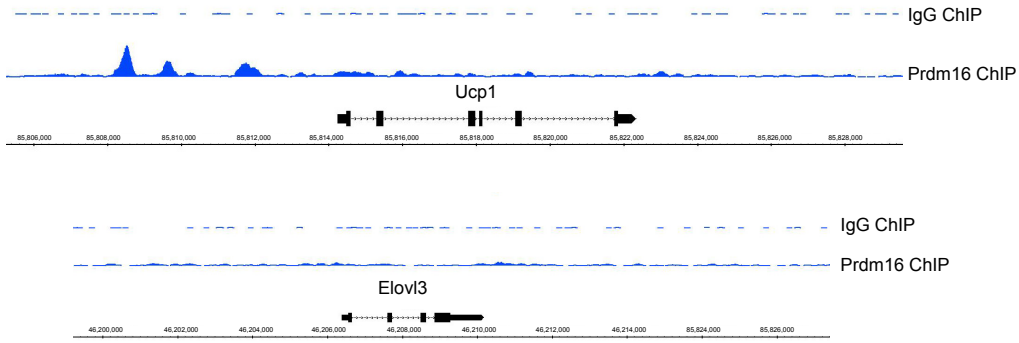

B

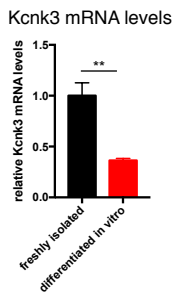

C

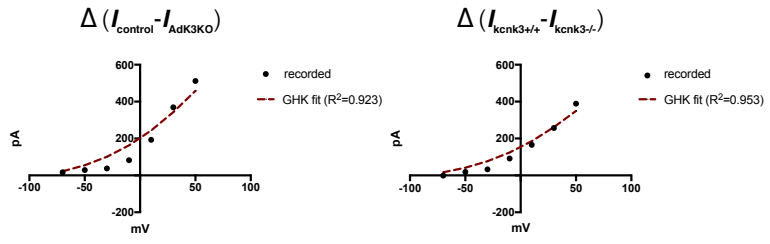

D

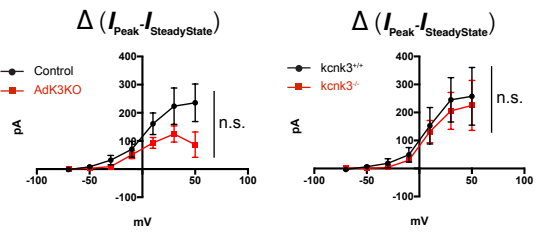

E

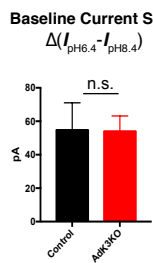

F

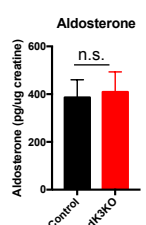

Supplement: NIHMS906044-supplement-1.pdf [file NIHMS906044-supplement-1.pdf]

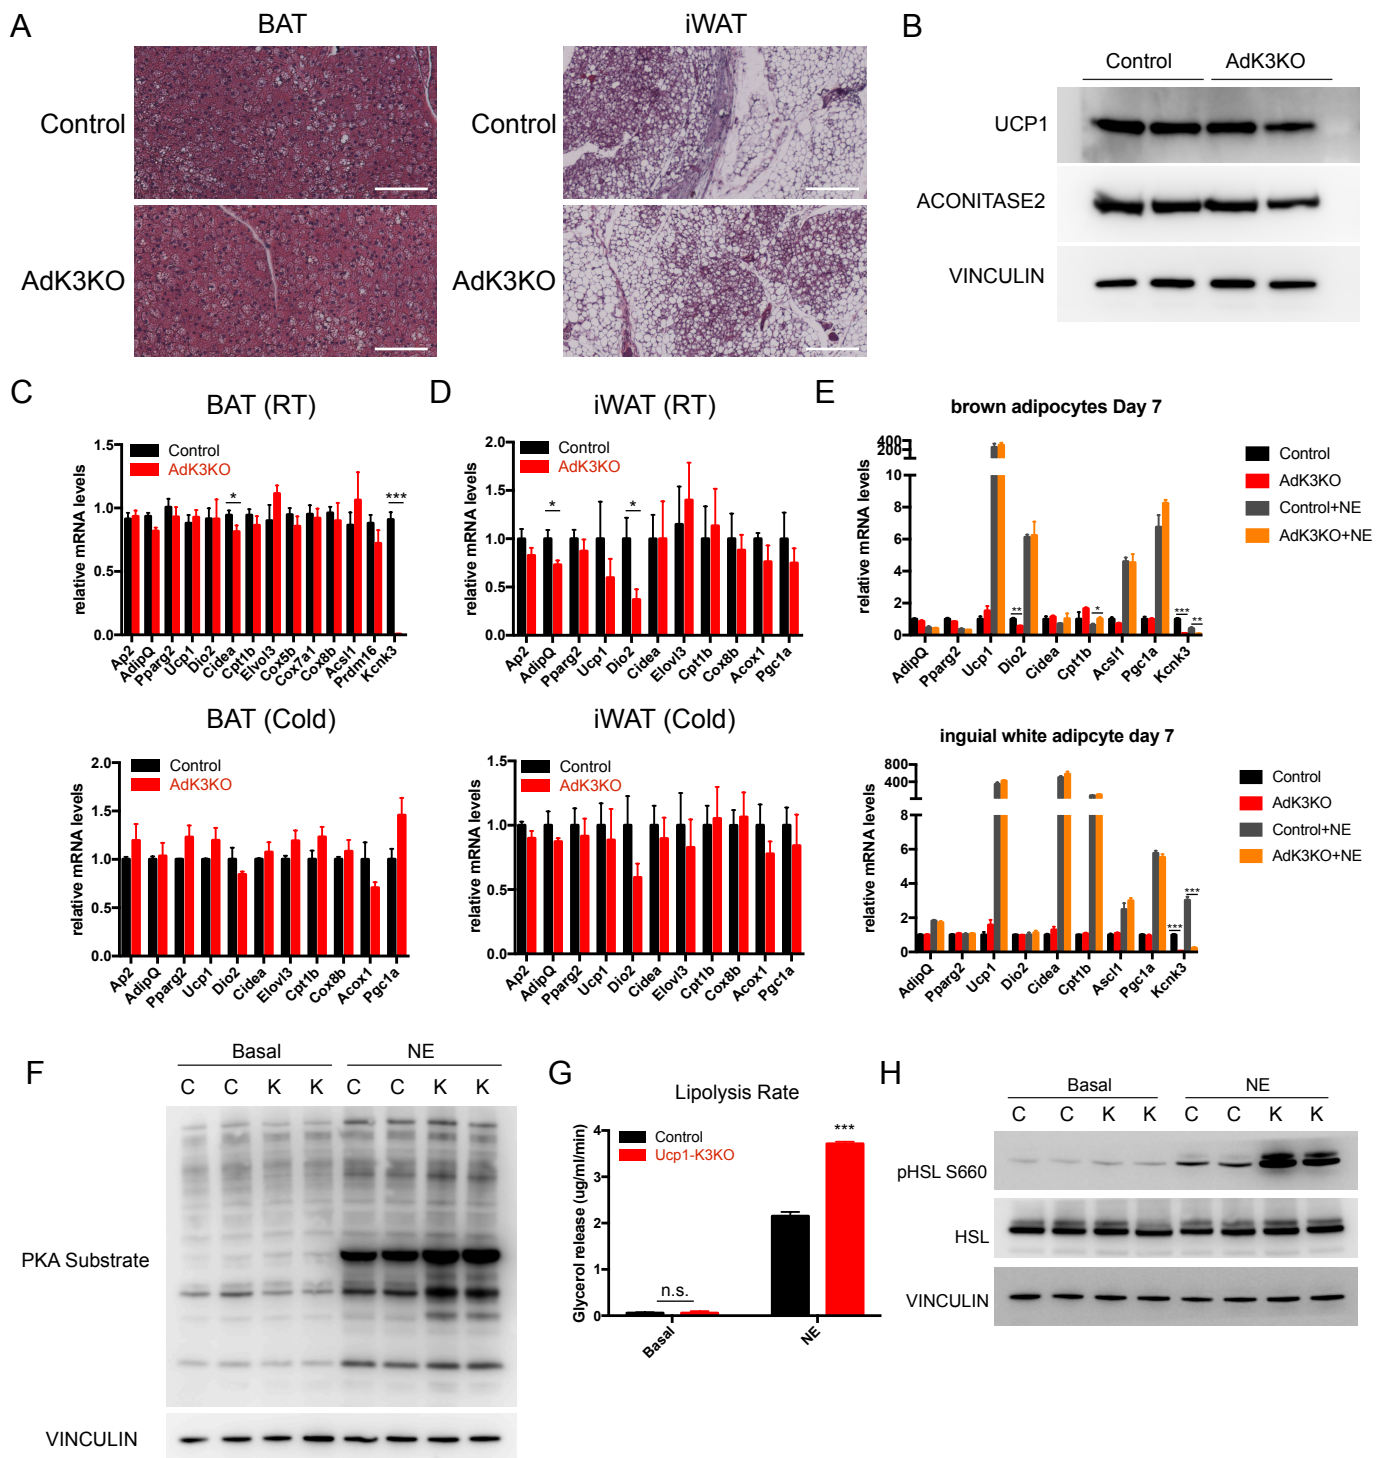

Supplement: NIHMS906044-supplement-2.pdf [file NIHMS906044-supplement-2.pdf]

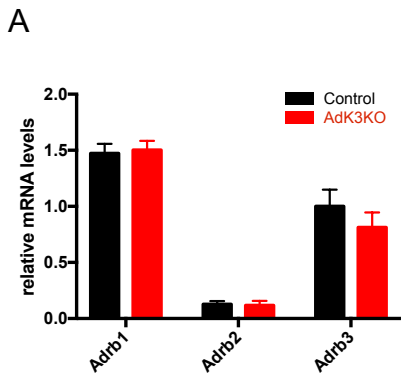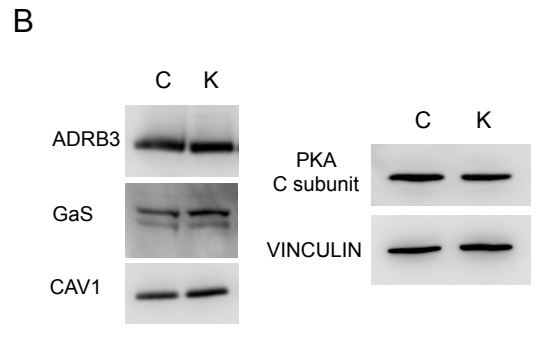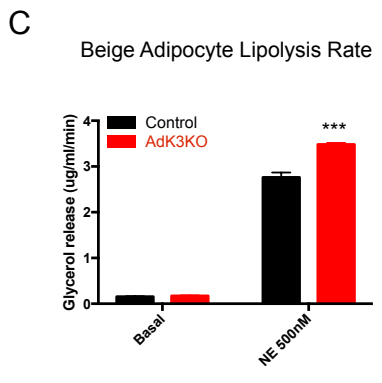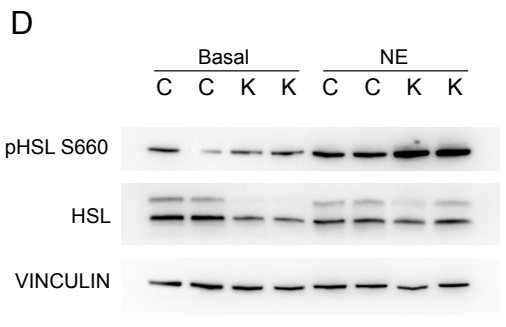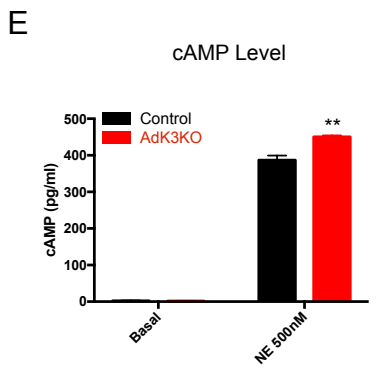

Supplement: NIHMS906044-supplement-3.pdf [file NIHMS906044-supplement-3.pdf]

A

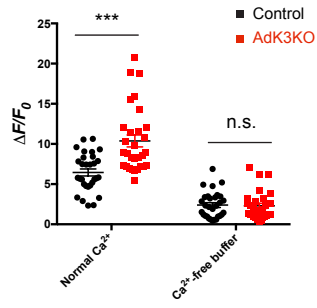

B

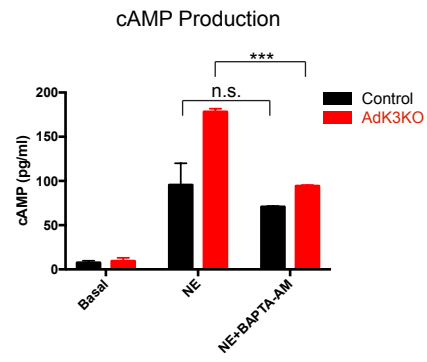

C

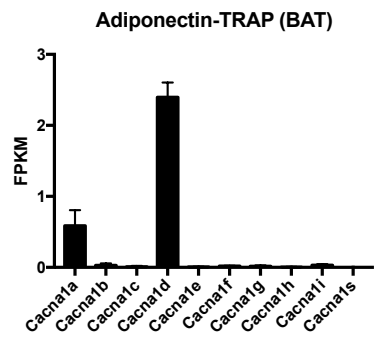

D

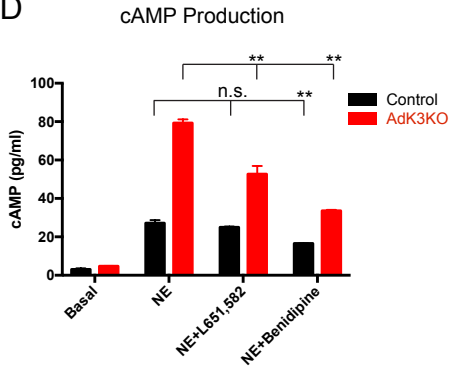

E

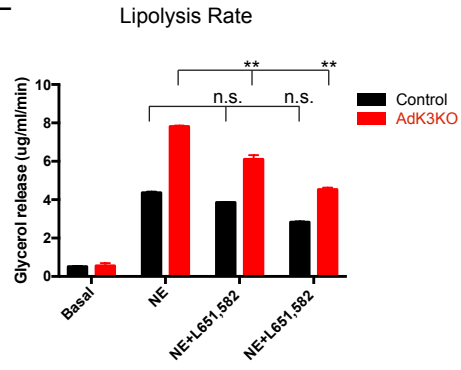

Supplement: NIHMS906044-supplement-4.pdf [file NIHMS906044-supplement-4.pdf]

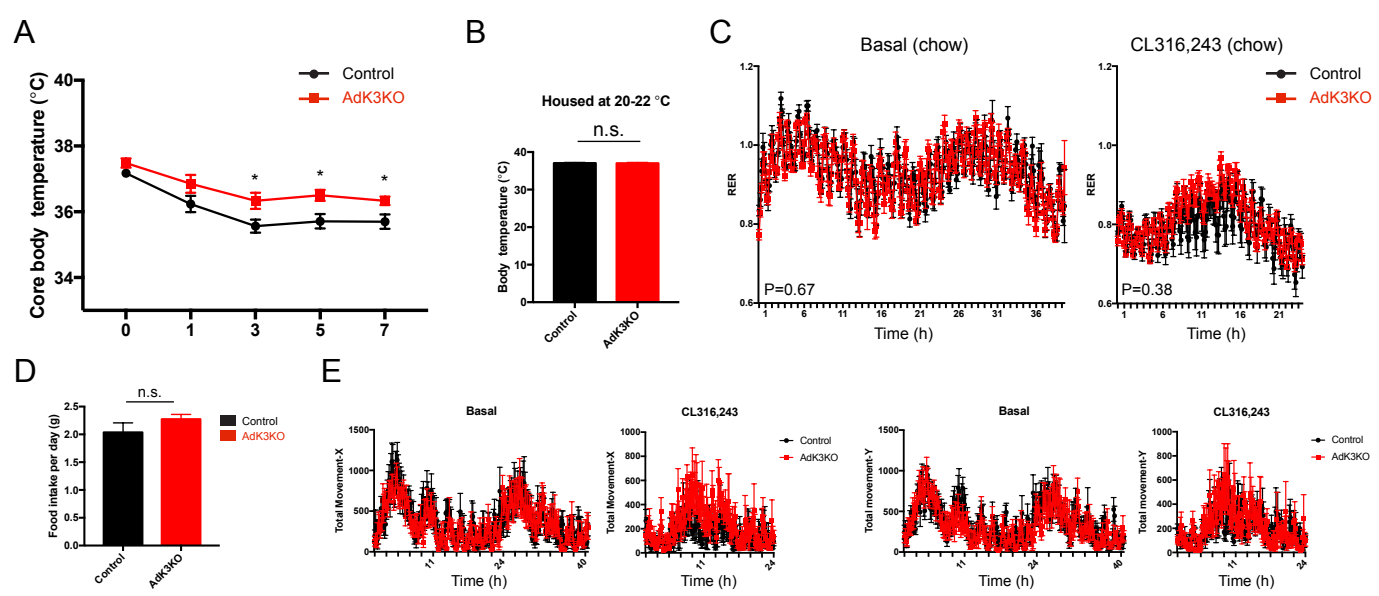

Supplement: NIHMS906044-supplement-5.pdf [file NIHMS906044-supplement-5.pdf]

A

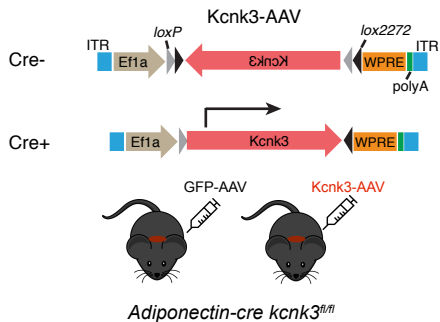

B

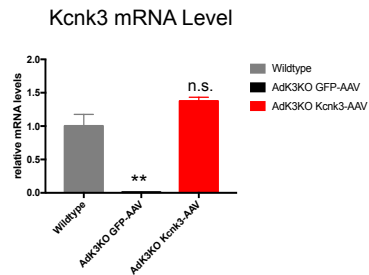

C

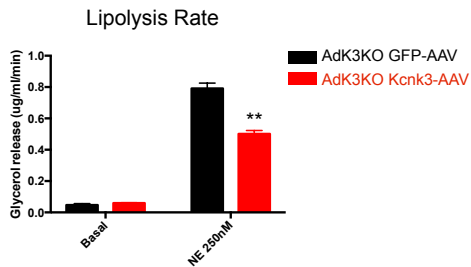

D

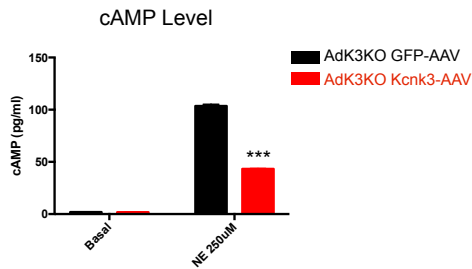

E

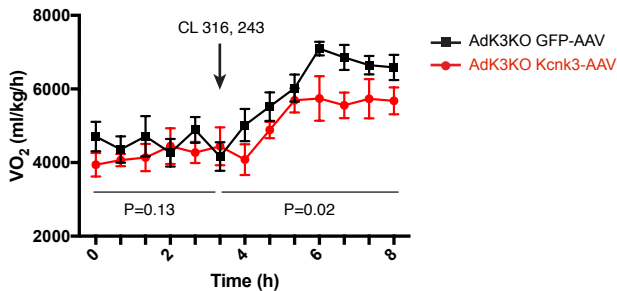

Supplement: NIHMS906044-supplement-6.pdf [file NIHMS906044-supplement-6.pdf]

**A**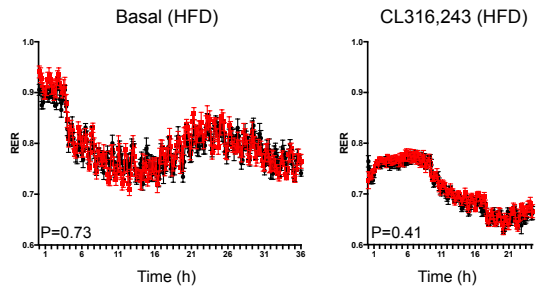**B**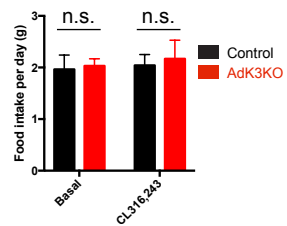**C**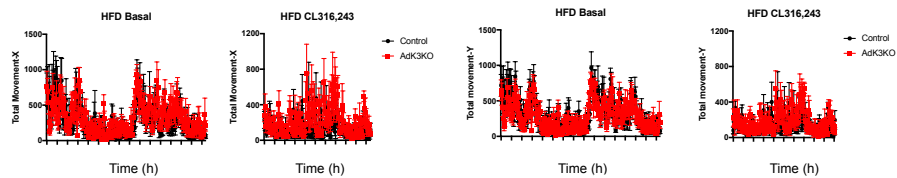**D**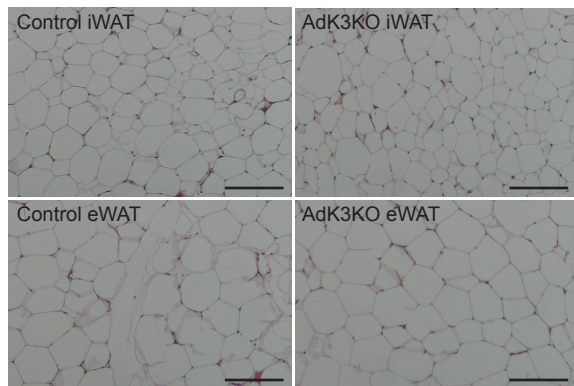

Supplement: NIHMS906044-supplement-7.pdf [file NIHMS906044-supplement-7.pdf]
